# Supplementary material for: Whole-genome detection using multivalent DNA-coated colloids
Source: PubMed Central journal article supplement (PMC10500262; doi:10.1073/pnas.2305995120), 2023-09-05
Supplement: pnas.2305995120.sapp.pdf [file pnas.2305995120.sapp.pdf]

1

## 2 **Supporting Information for**

### 3 **Whole Genome Detection using Multivalent DNA-Coated Colloids**

4 **Peicheng Xu, Ting Cao, Qihui Fan, Xiaochen Wang, Fangfu Ye, Erika Eiser**

5 **Erika Eiser and Fangfu Ye.**

6 **E-mail: [Erika.Eiser@ntnu.no](mailto:Erika.Eiser@ntnu.no), [fye@iphy.ac.cn](mailto:fye@iphy.ac.cn)**

#### 7 **This PDF file includes:**

8 Supporting text

9 Figs. S1 to S9

10 SI References

## 11 Supporting Information Text

### 12 Optimization of the biosensor

13 Several factors influence the performance of the MMV-PS probe colloids. We tested the effect of varying the concentration of  
14 the PS-*b*-PEO- $N_3$  diblock-copolymer, which anchors the MMV-probe strands to the particle surface (see subsection (A) below),  
15 the effect of varying grafting densities of the ssDNA probes (B), the effect of changing the  $Cu^{2+}$  concentration in the solution  
(C), and the effect of changing the salt (NaCl) concentration (D).

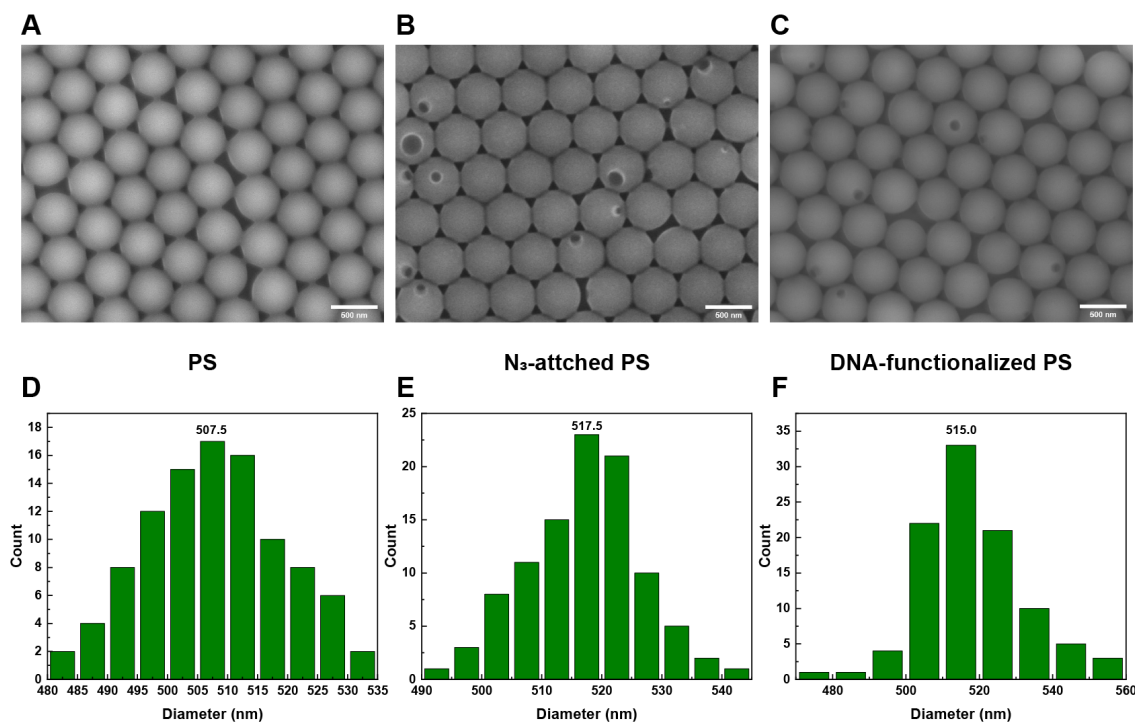

**Fig. S1.** SEM images of (A) plain, surface-charged PS particles, (B) those functionalized with PS-*b*-PEO- $N_3$  and (C) after attachment of the 20 nucleotide-long ssDNA to the PEO- $N_3$  ends via click chemistry. (D)-(F) Corresponding size distributions of the bare and functionalized PS particles. The scale bars correspond to 500 nm.

16

17 **A. Grafting density of the PS-*b*-PEO- $N_3$  on the PS-colloid surfaces.** The grafting density of the MMV-DNA strands per colloid  
18 is controlled by the grafting density of the PS-*b*-PEO- $N_3$  (abbreviated as PS-PEO- $N_3$ ) diblock copolymer on the colloid surfaces.  
19 We used a protocol by Oh et al. (1), modified and characterized by the Eiser group (2-4), in which the PS particles are swollen  
20 with THF such that the short, hydrophobic PS-blocks can penetrate into the particles, while the water-soluble PEO- $N_3$  blocks  
21 remain solvated in the aqueous phase. By subsequent replacement of the aqueous THF-solution with deionized water the  
22 swollen PS particles deswell and return into their glassy state, thereby locking the PS-blocks in. Varying the block-copolymer  
23 solution from zero to 2 mM, we find that at the optimal block-copolymer to colloid concentration ratio (here it is  $1:10^8$ ) we  
24 have a grafting density of  $12 \text{ nm}^2$  per chain, which corresponds to  $\sim 7 \times 10^4$  chains per 513 nm large PS-bead (4). At such a  
25 grafting density the block-copolymer forms a sterically stabilizing polymer brush of only a few nanometer thickness (Fig. S1),  
26 which suppresses non-specific colloid-colloid interactions such as van der Waals (5) or Coulomb. In all following tests and the  
27 results presented in the main article we used this highest block-copolymer grafting density. Note that attaching the ssDNA  
28 strands to the PEO-brush layer did not seem to further increase the overall diameter of the colloids (Fig. S1F).

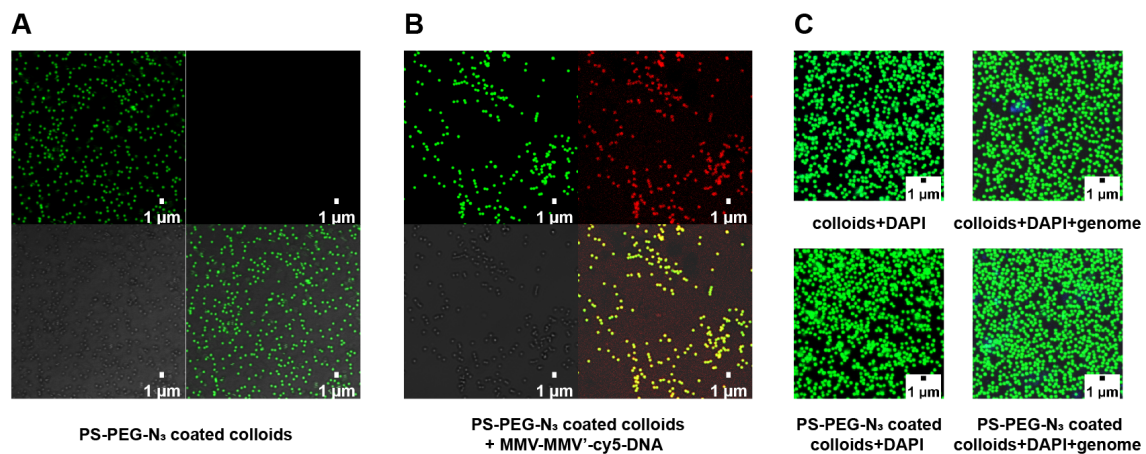

**Fig. S2.** Confocal images of (A) our green-fluorescent PS particles, coated with a dense brush of PS-b-PEO-N<sub>3</sub> diblock copolymers recorded in the green (top left), red (top right), bright field (bottom left) and superposed (bottom right) imaging mode. (B) Confocal microscopy images of the same type particles after functionalizing them with ssDNA and subsequently hybridizing them with complementary, red-fluorescent, cy5-ssDNA. The same imaging modes were used as in (A). (C) The effect of DAPI staining: Confocal microscope images of DAPI stained plain PS-particle solutions without (top left) and with the target genome (top right), and polymer-brush coated particle solutions without (bottom left) and with the target genome (bottom left). Here we show the overlay of the green and blue fluorescent channel.

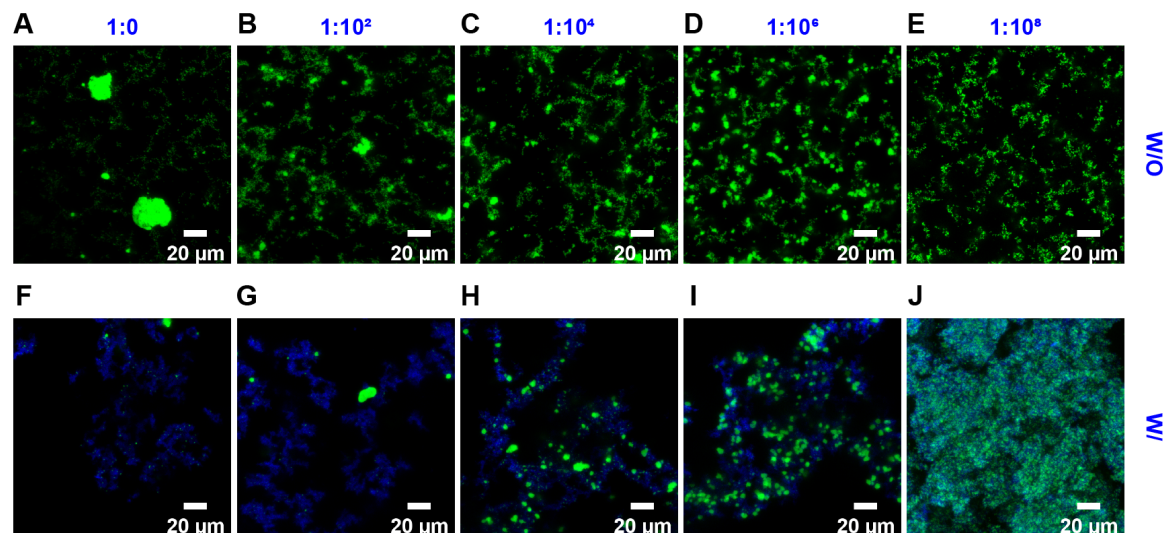

**Fig. S3.** Effect of PS-b-PEO-N<sub>3</sub> grafting density on the colloidal aggregation in the absence (W/O) and presence (W/) of the *E.coli* bl21-de3 genome. Confocal microscopy images of solutions of bare colloids (A), and those coated with a grafted block-copolymers using a preparation of 1:10<sup>2</sup> colloids per PS-b-PEO-N<sub>3</sub> chains up to 1:10<sup>8</sup> colloids per PS-b-PEO-N<sub>3</sub> chains (B-E) measured in the presence of the target genome, and without (F-J) the target genome. Here, E8 was prepared by mixing 2000  $\mu$ L PS-PEO-azide (2.5mM) with 150  $\mu$ L PS (10g/L). All samples contained 1g/L DAPI.

29 **B. Covalent bonding of ssDNA probes to the PS-b-PEO-N<sub>3</sub> brush.** The covalent attachment of the alkyne-terminated ssDNA  
 30 strands was performed using the Copper(I) catalysed azide(N<sub>3</sub>)-alkyne cycloaddition, which is a click reaction that works in  
 31 water; the reaction is fast, highly efficient over a range of pH's and temperatures, produces minimal by-products and has  
 32 yields >90% (4, 6). The efficacy of this MMV-DNA attachment was tested by hybridizing them with complementary ssDNA  
 33 strands carrying a red fluorescent cy5-MMV'-DNA. In Fig. S2 we show confocal images of the green fluorescent PS-particles,  
 34 functionalized with the block-copolymer brush and after attachment of the probe DNA, reacted with the red-fluorescent  
 35 complimentary MMV'-DNA.

36 The propensity of our bare, green PS-colloids and those grafted with different PS-PEO-N<sub>3</sub>-brush densities were tested for  
 37 self-aggregation, both in the absence (W/O) and presence (W/) of the target genome. Note that all solutions were prepared  
 38 in PBS buffer containing ascorbic acid and 1g/L of the DAPI fluorophore. The results are shown in Fig. S3. A comparison  
 39 between the confocal images Fig. S3A and F, of suspension prepared in the solvent conditions used in the final, optimal probe  
 40 solutions, it is clear that DAPI promotes strong aggregation of the bare PS-colloids in the absence of the genome. This colloidal  
 41 aggregation is almost completely suppressed in the presence of the genome, which is due to the fact that the DAPI preferentially  
 42 interacts with the genomic DNA, even after it has been denatured. This is due to the fact that locally hybridization between  
 43 the long DNA sequences can occur. Note that in Fig. S3 we only show the green fluorescent channel in the confocal images.  
 44 Monitoring also the blue DAPI fluorescence, indeed indicates weak but negligible DAPI-DNA binding.



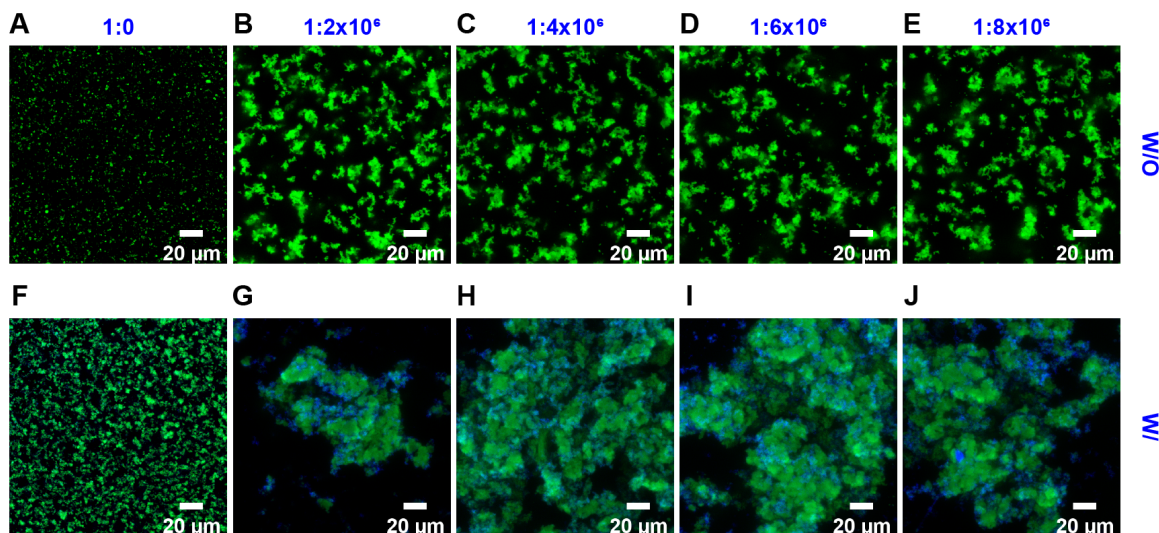

**Fig. S4.** Testing the MMV-DNA grafting density on the probe colloids. Overlay of green and blue fluorescence confocal microscope images taken in the absence of the denatured *E. coli* genome for (A) colloids grafted only with the PS-PEO-N<sub>3</sub> brush and (B-E) for increasing colloid to MMV-DNA concentrations after the click-reaction and removal of excess DNA and reaction products. All images were taken from solutions containing DAPI. In the presence of genome the confocal images show (F-J) that with increasing MMV-grafting density on the colloid surface the effective cluster size is increasing while keeping the genome density fixed.

45 In Fig. S4 we show how the MMV-DNA grafting density on the colloid-PEO-N<sub>3</sub> brush influences the binding of the probes  
 46 with the target bacterial genome. The alkyne-modified ssDNA probes are attached to the colloidal surface using a click reaction  
 47 with the azide group of the PS-b-PEO-N<sub>3</sub> block copolymers on the colloidal surface. The concentration of the alkyne-modified  
 48 ssDNA probes in solution determines the resulting surface coverage of ssDNA probes reacted to the PEO-azide chain ends. In  
 49 our tests, the number of grafted DNA probes per colloid was varied by varying the ratio of colloids per MMV-DNA concentration  
 50 from 1:0 to 1:8 × 10<sup>6</sup>. In Fig. S4 we see that we see some aggregation of the DNA-coated colloids in the presence of 1 g/L  
 51 DAPI, which we found to promote weak aggregation between the ssDNA strands on the colloids. However, this aggregation is  
 52 negligible compared to the cluster growth in the presence of the target genome, as is visible in Fig. S4F-J: The aggregation size  
 53 increases with the surface coverage of the DNA probes, and saturates when the number of DNA probes per colloid exceeds ≈4  
 54 × 10<sup>6</sup>. This coverage was achieved by exposing the azide-functionalized colloids to a DNA probe solution with a concentration  
 55 of 5 μM. We note that the pure PS-PEO-N<sub>3</sub> coated colloids formed very few, negligibly small aggregates, even in the presence  
 56 of DAPI (Fig. S4A). In view of the outcome of the above tests, we fixed the DNA surface coverage of the PS colloids at 4 × 10<sup>6</sup>  
 57 in all subsequent experiments.

58 **C. Effect of  $\text{Cu}^{2+}$ , necessary for the click-reaction.** Another parameter that affects the performance of the multivalent genome  
59 detection is the  $\text{Cu}^{2+}$  concentration used in the click reaction to graft the ssDNA probes onto the azide ends of the PEO  
60 brush on the colloids. We carried out the click reaction using  $\text{Cu}^{2+}$  concentrations varying from 0 to 20000  $\mu\text{M}$ , while the  
61 corresponding concentration of ascorbic acid was five times higher. As can be seen from Fig. S5, an increase of the  $\text{Cu}^{2+}$   
62 concentration during the preparation of the MMV-DNA grafted colloids resulted in an increase of the aggregate size and  
63 fluorescence intensity of the resulting DNA-coated colloids, when these were mixed with target genome. However, the aggregate  
64 size reached a peak when the click reaction was carried out at a  $\text{Cu}^{2+}$  concentration of 2 mM. Higher  $\text{Cu}^{2+}$  concentrations  
65 appeared to damage ssDNA, resulting in a decreased binding between the colloids and the target genome (Fig. S6A). DNA  
66 damage due to the presence of  $\text{Cu}^{2+}$  ions has been reported earlier (7). When the click reaction was carried out at much lower  
67  $\text{Cu}^{2+}$  concentrations, only few DNA probes could be grafted onto PS particles and the binding of the colloids to the targeted  
68 genome was strongly suppressed (Fig. S5B for the 20 mM  $\text{Cu}^{2+}$  concentration).

69 Based on the above findings, the  $\text{Cu}^{2+}$  concentration of 2 mM used for the click reaction did not seem to affect the  
aggregation behaviour of colloids in the presence of the target genome, and thus was used for all further experiments.

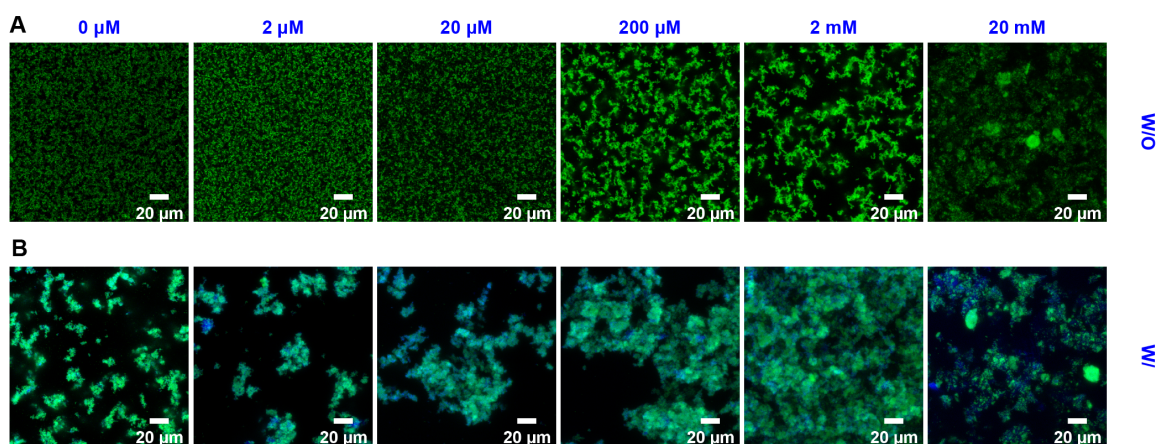

**Fig. S5.** Effect of the  $\text{Cu}^{2+}$  concentration on the click-reaction. Like in Fig. S4 we show the overlay of green and blue fluorescence confocal microscope images taken in the absence of the denatured *E. coli* genome for (A) colloids grafted with the PS-PEO-MMV brush for increasing  $\text{Cu}^{2+}$  concentration used in the click-reaction to attach MMV-DNA ( $4 \times 10^6$ ) to the azide ends of the PEO brush. All images were taken from solutions containing 1 g/L DAPI. (B) In the presence of the genome the confocal images show that the largest clusters are observed using a 2mM  $\text{Cu}^{2+}$  concentration for the click reaction.

70

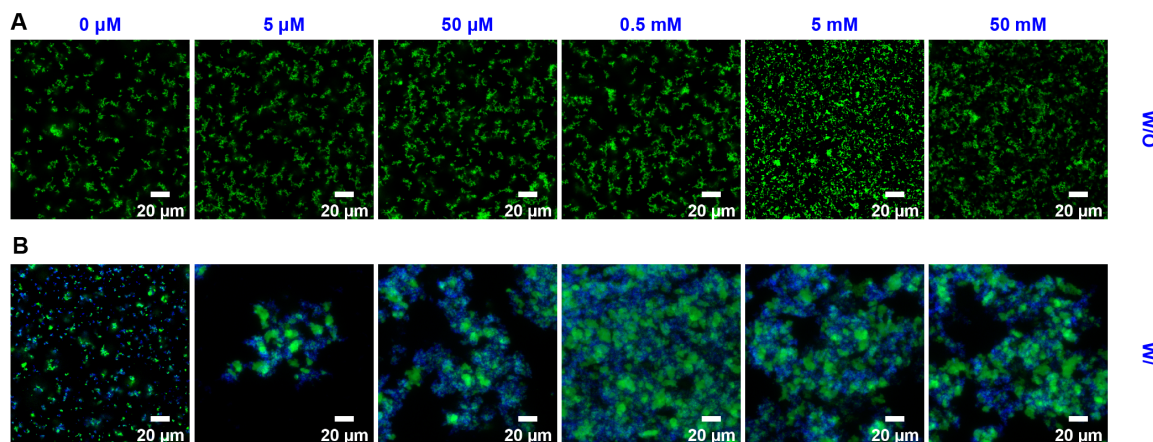

**Fig. S6.** Effect of the added NaCl concentration on the hybridization efficiency of the MMV-probes with the target genome. Like in Fig. S5 we show the overlay of green and blue fluorescence confocal microscope images taken in the absence of the denatured *E. coli* genome for (A) colloids grafted with the PS-PEO-MMV brush for increasing added NaCl in the presence of 2 mM  $\text{Cu}^{2+}$  and best MMV coverage found in Fig. S4. All images were taken from solutions containing 1 g/L DAPI. (B) In the presence of the genome the confocal images show that the largest clusters are observed using 0.5 mM added NaCl.

71 **D. Effect of added NaCl.** The 1:1 salt NaCl is typically needed to screen the electrostatic repulsion between the negatively  
 72 charged sugar-phosphate backbones of the DNA single strands, in order for them to be able to bind to each other via hydrogen  
 73 bonds. We explored what range of NaCl concentrations is needed for optimal genome detection.

74 In Fig. S6B we can see that in the presence of the target genome, the size of colloidal aggregates initially increases with  
 75 salt concentration and then slightly decreases as the salt concentration is varied from 0 to 50 mM. In the absence of NaCl,  
 76 small aggregates still formed since DAPI is also a salt. Furthermore, the present  $\text{Cu}^{2+}$  concentration adds to the overall  
 77 screening of the negative charge along the ssDNA backbones. Note that the electrostatic repulsion between equal charges is  
 78 stronger for divalent than of monovalent salts such as NaCl (8). The size of aggregates reached a maximum value for a NaCl  
 79 concentration of  $\approx 0.5$  mM, and decreased slightly beyond that concentration. Hybridization (binding) and dehybridization  
 80 (unbinding) measurements of short, complementary ssDNA sequences as function of added NaCl concentration showed that  
 81 only for concentrations  $\geq 50$  mM in deionized water equilibrium hybridization was observed (9). Below that concentration a  
 82 hysteresis in the melting/heating curves is observed. As we have also  $\text{Cu}^{2+}$  and DAPI are present the overall ionic strength of  
 83 the final solution containing the probe colloids and genome is still a bit lower than that 50 mM limit. The melt temperature  
 84 of a complementary duplex decreases slightly with increasing salt. Therefore, we can assume that in our case the final ionic  
 85 strength should be a bit lower than that for equilibrium hybridization, meaning the weaker screening of the negative backbone  
 86 charges helps the MMV-probes to bind and unbind with greater probability than for higher ionic strengths, enabling the system  
 87 to reach its lowest binding-free energy. In other words, upon further increasing the NaCl concentrations leads to stronger  
 88 binding energies and thus kinetically slowing down the formation of the maximum number of base-pairs due to kinetic hin.  
 89 This kinetic slowing down may lead to the smaller clusters we observe at higher NaCl concentrations. Note that all samples are  
 90 mixed at room temperature. The influence on aggregation was also studied earlier on suspensions of DNA-coated fd-viruses  
 91 binding to each other via gold-nanoparticles, coated with the complementary ssDNA (10).

92 Further, we find that the added NaCl concentration has little effect on the size of the colloidal clusters formed in the absence  
 93 of genome Fig. S6A. Thus, in all results shown in the main text we used the optimum salt concentration of 0.5 mM NaCl. In  
 94 this work the aggregation type was discussed as function of quenching rates below the systems melting temperature.

95 **Choice of control parameters**

96 In Fig. S7 we present bar charts of the size of the aggregated colloidal clusters formed, when testing the four different parameters  
 97 presented above. While we show the overlaid confocal images of the green and blue fluorescence of the colloids and the DAPI  
 98 interacting with the genomic DNA in Figs. S13-S16, we extracted the observed cluster sizes using only the green fluorescence  
 99 of the colloids, avoiding exciting the DAPI fluorophore in order to minimize possible cross-talk. The aggregate sizes were  
 100 extracted from stacks of confocal images, each representing a thickness  $\Delta z = 1.48 \mu\text{m}$ , as described in the main text.

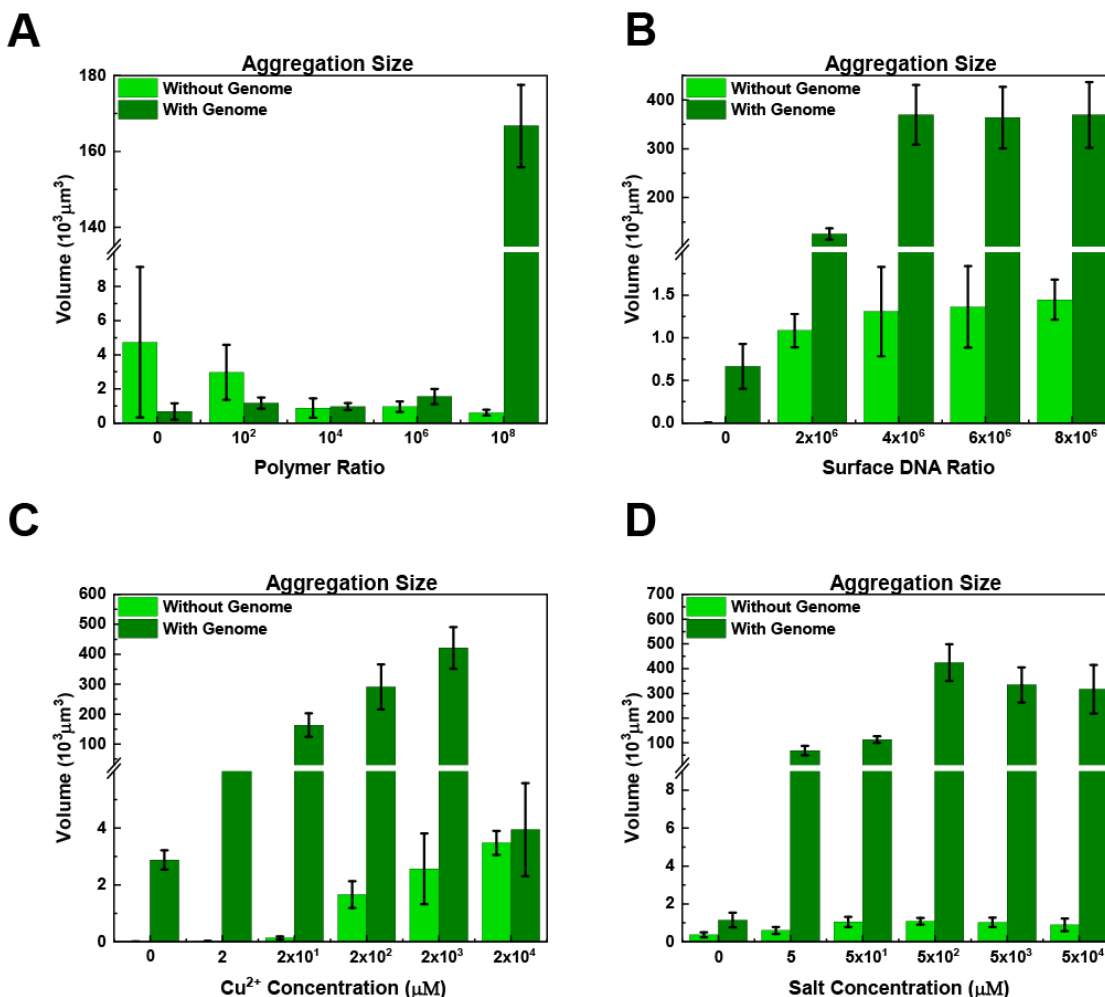

**Fig. S7.** Effect of four control parameters on the performance of the proposed biosensor. The operating conditions used in the main text were selected on the basis of the above data. The relation between the observed aggregate size of PS colloids as a function of (A) polymer ratio, (B) DNA probe ratio, (C)  $\text{Cu}^{2+}$  concentration, (D) salt concentration. Note that, in order to represent genomic and non-genomic data on the same plots, the figures have a scale change of more than two orders of magnitude

101 **Stability of the MMV-colloidal probes**

In Fig. S8 we show confocal images in which we tested the stability of our MMV-probes against degradation in time.

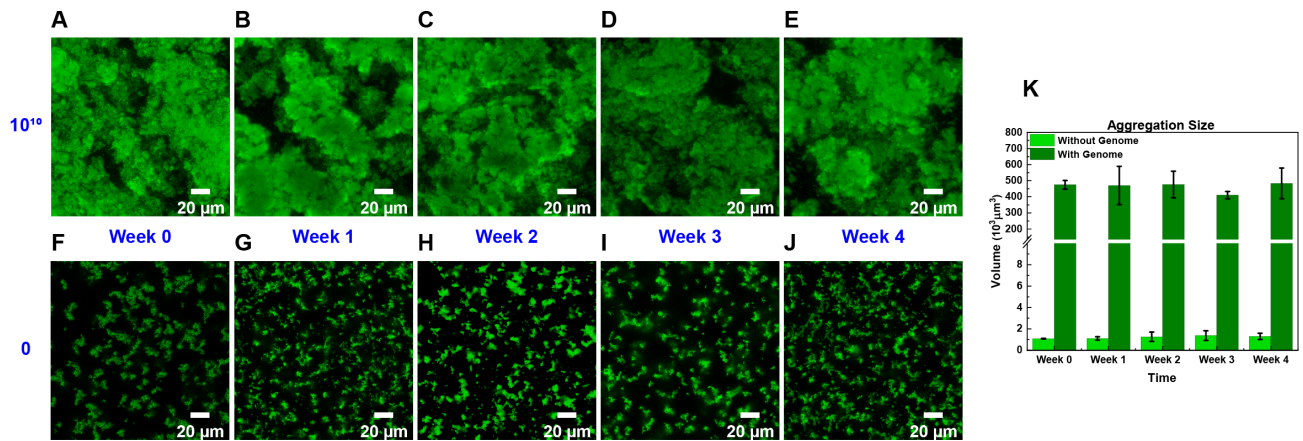

**Fig. S8.** Stability of the proposed biosensor. Confocal microscopy images, showing green fluorescence of the probe-colloids only, of the formation of genome-induced aggregates for different times after the preparation of the DNA-functionalized probes. Frames (A-E) show the aggregates formed upon addition of the target genome after 0 to 4 weeks. Here we used a genome density of  $10^{10}$  copies/mL. Frames (F-J) illustrate the absence of large-scale aggregation of the pure MMV-coated colloidal probe solutions over the same period. All samples here contained a 1 g/L DAPI concentration.

103 **Selectivity of the MMV-colloidal probes**

104 We tested the selectivity of our MMV-probes, designed to recognize the *E.coli* bl21-de3 genome, by mixing these probes with  
105 the genomes of six other bacteria. Using the solvent condition chosen for detecting our *E.coli* strain, we observe that even for  
106 hundred-fold higher concentrations of the other bacterial genomes we do not observe comparably strong colloid aggregation (Fig. S9).

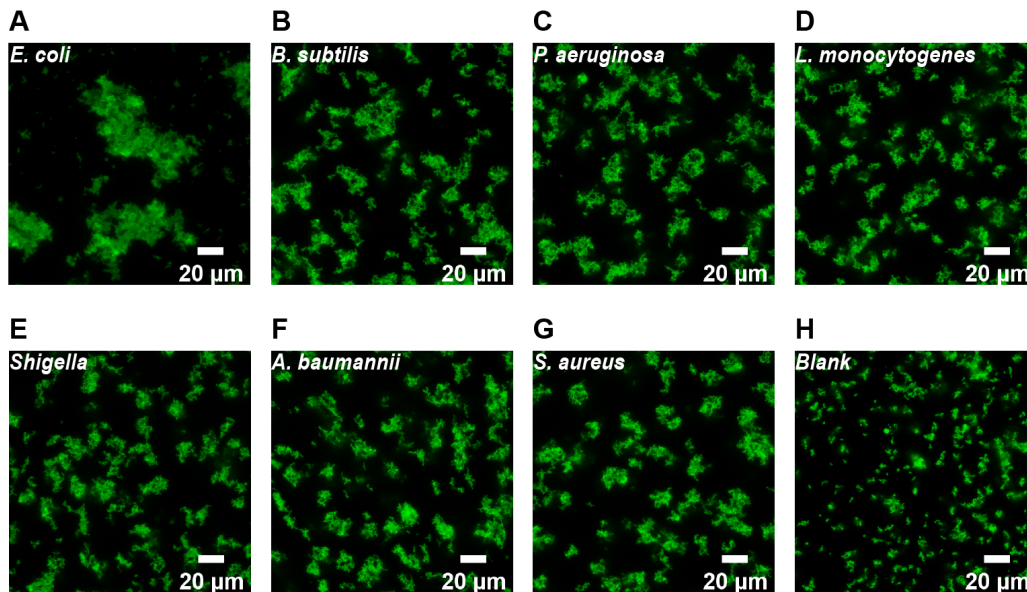

**Fig. S9.** Confocal images, comparing the selectivity of our MMV-probes for the *E.coli* bl21-de3 genome with six other bacterial genomes. Here we used an *E.coli* concentration of  $10^5$  copies/mL, while all other samples contained  $10^7$  copies/mL.

107



108 **References**

- 109 1. JS Oh, Y Wang, DJ Pine, GR Yi, High-density pco-b-dna brushes on polymer particles for colloidal superstructures.  
110 *Chem. Mater.* **27**, 8337–8344 (2015).
- 111 2. M Zupkauskas, Y Lan, D Joshi, Z Ruff, E Eiser, Optically transparent dense colloidal gels. *Chem. Sci.* **8**, 5559–5566  
112 (2017).
- 113 3. A Caciagli, et al., Dna-coated functional oil droplets. *Langmuir* **34**, 10073–10080 (2018).
- 114 4. T O’Neill, Ph.D. thesis (University of Cambridge, Cavendish Laboratory, J. J. Thomson Avenue, Cambridge CB3 0HE,  
115 U.K.) (2019).
- 116 5. SC Tsai, K Zammouri, Role of interparticular van der waals force in rheology of concentrated suspensions. *J. Rheol.* **32**,  
117 737–750 (1988).
- 118 6. C Spiteri, JE Moses, Copper-catalyzed azide–alkyne cycloaddition: regioselective synthesis of 1, 4, 5-trisubstituted 1, 2,  
119 3-triazoles. *Angewandte Chemie Int. Ed.* **49**, 31–33 (2010).
- 120 7. L Cai, J Koropatnick, MG Cherian, Roles of vitamin c in radiation-induced dna damage in presence and absence of copper.  
121 *Chem. Interactions* **137**, 75–88 (2001).
- 122 8. JN Israelachvili, *Intermolecular and surface forces*. (Academic press), (2011).
- 123 9. Z Xing, et al., Microrheology of dna hydrogels. *Proc. Natl. Acad. Sci.* **115**, 8137–8142 (2018).
- 124 10. Z Ruff, et al., Designing disordered materials using dna-coated colloids of bacteriophage fd and gold. *Faraday discussions*  
125 **186**, 473–488 (2016).
